# Supplementary material
Source: Royal Society of Chemistry journal article supplement (doi:10.1039/d6cp00505e)
Supplement: d6cp00505e1.pdf [file d6cp00505e1.pdf]

## Supplementary Information

### Orthorhombic Si<sub>6</sub>: Prediction of a metastable sp<sup>3</sup> silicon semimetal with pseudo-Dirac nodal line

Xueqi Wang,<sup>a</sup> Qianqian Wang,<sup>\*a</sup> Biao Wan,<sup>a</sup> Zhuangfei Zhang,<sup>a</sup> Weixia Shen,<sup>a</sup> Chao Fang,<sup>a</sup> Yuewen Zhang,<sup>a</sup> Liangchao Chen,<sup>a</sup> Zhisheng Zhao<sup>b</sup> and Julong He<sup>b</sup>

<sup>a</sup>School of Physics and Laboratory of Zhongyuan Light, Zhengzhou University, Zhengzhou 450052, China

<sup>b</sup>Center for High Pressure Science, State Key Laboratory of Metastable Materials Science and Technology, Yanshan University, Qinhuangdao 066004, China

\*Email: [qqwang@zzu.edu.cn](mailto:qqwang@zzu.edu.cn)

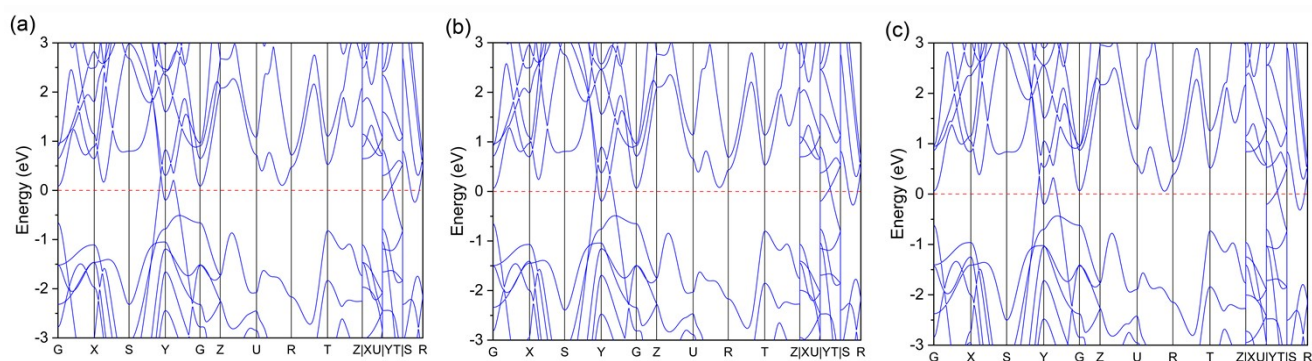

**Fig. S1** Band structures of oP-Si<sub>6</sub> calculated by DFT-PBE at (a) 3 GPa, (b) 6 GPa, (c) 12 GPa in hydrostatic condition.

**Table S1** The calculated elastic constants  $C_{ij}$ , bulk moduli  $B$  (GPa), and shear moduli  $G$  (GPa) of fully-relaxed oP-Si<sub>6</sub> and Si-I phase at 0 GPa by PBE functional.

| Phase              | $C_{11}$ | $C_{22}$ | $C_{33}$ | $C_{44}$ | $C_{55}$ | $C_{66}$ | $C_{12}$ | $C_{13}$ | $C_{23}$ | $B$ | $G$ |
|--------------------|----------|----------|----------|----------|----------|----------|----------|----------|----------|-----|-----|
| Si-I               | 153      |          |          | 99       |          |          | 57       |          |          | 89  | 74  |
| oP-Si <sub>6</sub> | 201      | 175      | 234      | 110      | 75       | 103      | 61       | 21       | 38       | 95  | 88  |

**Table S2** Calculated  $d$ -spacings ( $\text{\AA}$ ,  $d_{\text{cal}}$ ) of oP-Si<sub>6</sub> (fully-relaxed by both LDA and GGA functional at 0 GPa) compared with the experimental  $d$ -spacings ( $\text{\AA}$ ,  $d_{\text{obs}}$ ) from both synchrotron XRD reflections and FFT electron diffractions in Ref.30. Question marks indicate the measured  $d$ -spacings from unknown structures.  $(d_{\text{obs}}-d_{\text{cal}})/d_{\text{obs}}$ (%) represent the  $d$ -spacing error between the XRD and the simulated value.

| oP-Si <sub>6</sub><br>(hkl) | LDA                               |                                                      | GGA                               |                                                      | I/Imax      | XRD                                          | FFT                                          |
|-----------------------------|-----------------------------------|------------------------------------------------------|-----------------------------------|------------------------------------------------------|-------------|----------------------------------------------|----------------------------------------------|
|                             | $d_{\text{cal}}$ ( $\text{\AA}$ ) | $(d_{\text{obs}}-d_{\text{cal}})/d_{\text{obs}}$ (%) | $d_{\text{cal}}$ ( $\text{\AA}$ ) | $(d_{\text{obs}}-d_{\text{cal}})/d_{\text{obs}}$ (%) |             | $d_{\text{obs}}\pm\Delta d$ ( $\text{\AA}$ ) | $d_{\text{obs}}\pm\Delta d$ ( $\text{\AA}$ ) |
| (001)                       | 6.863                             |                                                      | 6.944                             |                                                      | 0           |                                              |                                              |
| (010)                       | 3.985                             |                                                      | 4.042                             |                                                      | 0.2         |                                              | 4.2±0.23                                     |
| (100)                       | 3.822                             |                                                      | 3.871                             |                                                      | 27.0        |                                              | 3.82±0.20                                    |
| (011)                       | 3.446                             |                                                      | 3.493                             |                                                      | 0           |                                              | 3.60±0.17 (??)                               |
| (002)                       | 3.432                             |                                                      | 3.472                             |                                                      | 19.2        |                                              |                                              |
| (101)                       | 3.339                             |                                                      | 3.381                             |                                                      | 0           |                                              | 3.29±0.14                                    |
| (110)                       | 2.758                             | 0.6                                                  | 2.796                             | -0.8                                                 | 19.7        | 2.774±0.009 (?)                              | 2.73±0.10                                    |
|                             |                                   | 0.2                                                  |                                   | -1.1                                                 |             | 2.765±0.008 (?)                              |                                              |
| (012)                       | 2.600                             | 1.7                                                  | 2.634                             | 0.45                                                 | 60.7        | 2.646±0.007 (??)                             | 2.64±0.09                                    |
|                             |                                   | 0.6                                                  |                                   | -0.3                                                 |             | 2.616±0.007                                  |                                              |
| (111)                       | 2.559                             |                                                      | 2.593                             |                                                      | 100         |                                              |                                              |
| (102)                       | 2.553                             | -3.9E-4                                              | 2.585                             | -1.3                                                 | 15.1        | 2.552±0.007 (?)                              | 2.51±0.08                                    |
| (003)                       | 2.288                             |                                                      | 2.314                             |                                                      | 0           |                                              | 2.29±0.07                                    |
| (112)                       | 2.150                             | 1.6                                                  | 2.177                             | 0.4                                                  | 18.2        | 2.185±0.005                                  | 2.21±0.06                                    |
| (020)                       | 1.992                             |                                                      | 2.021                             |                                                      | 0.1         |                                              | 2.00±0.05                                    |
| (013)                       | 1.984                             |                                                      | 2.008                             |                                                      | 0           |                                              |                                              |
| (103)                       | 1.963                             |                                                      | 1.986                             |                                                      | 0           |                                              |                                              |
| (021)                       | 1.913                             | 0.4                                                  | 1.940                             | -1.0                                                 | 0           | 1.920±0.005                                  |                                              |
| (200)                       | 1.911                             | -0.3                                                 | 1.936                             | -1.6                                                 | 3.0         | 1.906±0.005                                  | 1.91±0.05                                    |
| (201)                       | 1.841                             |                                                      | 1.864                             |                                                      | 0           |                                              | 1.82±0.04                                    |
| (120)                       | 1.767                             |                                                      | 1.792                             |                                                      | 4.5         |                                              | 1.77±0.04                                    |
| (113)                       | 1.761                             |                                                      | 1.783                             |                                                      | 28.4        |                                              |                                              |
| (022)                       | 1.723                             |                                                      | 1.747                             |                                                      | 19.6        |                                              |                                              |
| (210)                       | 1.723                             |                                                      | 1.746                             |                                                      | 15.2        |                                              |                                              |
| (004)                       | 1.716                             |                                                      | 1.736                             |                                                      | 18.4        |                                              | 1.71±0.04                                    |
| (121)                       | 1.711                             |                                                      | 1.735                             |                                                      | 21.5        |                                              |                                              |
| (211)                       | 1.671                             |                                                      | 1.693                             |                                                      | 0.01        |                                              |                                              |
| (202)                       | 1.669                             | 0.6                                                  | 1.690                             | -0.6                                                 | <b>33.3</b> | 1.679±0.004 (?)                              |                                              |
| (014)                       | 1.576                             |                                                      | 1.595                             |                                                      | 0.02        |                                              |                                              |
| (122)                       | 1.571                             |                                                      | 1.592                             |                                                      | 6.1         |                                              |                                              |
| (104)                       | 1.565                             |                                                      | 1.584                             |                                                      | 3.0         |                                              |                                              |
| (212)                       | 1.540                             |                                                      | 1.560                             |                                                      | 0.04        |                                              | 1.55±0.03                                    |
| (023)                       | 1.502                             |                                                      | 1.522                             |                                                      | 0           |                                              |                                              |
| (203)                       | 1.466                             |                                                      | 1.485                             |                                                      | 0           |                                              | 1.49±0.03                                    |
| (114)                       | 1.457                             |                                                      | 1.475                             |                                                      | 4.4         |                                              |                                              |
| (123)                       | 1.398                             | 0.1                                                  | 1.417                             | -1.2                                                 | 10.1        | 1.400±0.003                                  | 1.42±0.03                                    |
| (220)                       | 1.379                             |                                                      | 1.398                             |                                                      | 8.5         |                                              |                                              |
| (213)                       | 1.376                             |                                                      | 1.394                             |                                                      | 0.03        |                                              |                                              |
| (005)                       | 1.373                             |                                                      | 1.389                             |                                                      | 0           |                                              |                                              |
| (221)                       | 1.352                             |                                                      | 1.370                             |                                                      | 0.03        |                                              | 1.36±0.02                                    |
| (030)                       | 1.328                             | 1.5                                                  | 1.347                             | 7.4E-4                                               | 7.0         | 1.348±0.003 (??)                             |                                              |
| (031)                       | 1.304                             |                                                      | 1.323                             |                                                      | 0           |                                              | 1.31±0.02                                    |
| (024)                       | 1.300                             |                                                      | 1.317                             |                                                      | 0.04        |                                              |                                              |
| (015)                       | 1.298                             |                                                      | 1.313                             |                                                      | 0           |                                              |                                              |
| (105)                       | 1.292                             |                                                      | 1.307                             |                                                      | 0           |                                              |                                              |

| oP-Si <sub>6</sub> | LDA                         |                                                         | GGA                         |                                                         |        | XRD                                     | FFT                                     |
|--------------------|-----------------------------|---------------------------------------------------------|-----------------------------|---------------------------------------------------------|--------|-----------------------------------------|-----------------------------------------|
| (hkl)              | $d_{\text{cal}} (\text{Å})$ | $(d_{\text{obs.}}-d_{\text{cal.}})/d_{\text{obs.}}(\%)$ | $d_{\text{cal}} (\text{Å})$ | $(d_{\text{obs.}}-d_{\text{cal.}})/d_{\text{obs.}}(\%)$ | I/Imax | $d_{\text{obs.}}\pm\Delta d (\text{Å})$ | $d_{\text{obs.}}\pm\Delta d (\text{Å})$ |
| (222)              | 1.280                       |                                                         | 1.297                       |                                                         | 0.1    |                                         |                                         |
| (204)              | 1.277                       |                                                         | 1.292                       |                                                         | 1.3    |                                         |                                         |
| (300)              | 1.274                       |                                                         | 1.290                       |                                                         | 0.6    |                                         |                                         |
| (130)              | 1.255                       |                                                         | 1.272                       |                                                         | 1.3    |                                         |                                         |
| (301)              | 1.252                       |                                                         | 1.269                       |                                                         | 0      |                                         |                                         |
| (032)              | 1.239                       | 0.24                                                    | 1.256                       | -1.1                                                    | 1.2    | 1.242±0.002                             |                                         |
| (131)              | 1.234                       |                                                         | 1.252                       |                                                         | 0.2    |                                         |                                         |
| (124)              | 1.231                       |                                                         | 1.247                       |                                                         | 1.1    |                                         | 1.23±0.02                               |
| (115)              | 1.229                       |                                                         | 1.244                       |                                                         | 7.3    |                                         |                                         |
| (214)              | 1.216                       |                                                         | 1.231                       |                                                         | 8.1    |                                         |                                         |
| (310)              | 1.213                       | 0                                                       | 1.229                       | -1.3                                                    | 1.2    | 1.213±0.002                             |                                         |
| (311)              | 1.195                       | 0.9                                                     | 1.210                       | -0.3                                                    | 6.6    | 1.206±0.002 (??)                        | 1.20±0.02                               |
| (302)              | 1.194                       | 0.5                                                     | 1.209                       | -0.8                                                    | 1.2    | 1.200±0.002 (??)                        |                                         |
| (223)              | 1.181                       |                                                         | 1.196                       |                                                         | 1.6E-3 |                                         |                                         |
| (132)              | 1.178                       |                                                         | 1.195                       |                                                         | 1.9    |                                         |                                         |
| (033)              | 1.149                       |                                                         | 1.164                       |                                                         | 0      |                                         |                                         |
| (312)              | 1.144                       |                                                         | 1.159                       |                                                         | 1.7    |                                         |                                         |
| (006)              | 1.144                       |                                                         | 1.157                       |                                                         | 0.4    |                                         |                                         |
| (025)              | 1.130                       |                                                         | 1.144                       |                                                         | 0      |                                         |                                         |
| (205)              | 1.115                       |                                                         | 1.128                       |                                                         | 0      |                                         |                                         |
| (303)              | 1.113                       |                                                         | 1.127                       |                                                         | 0      |                                         |                                         |
| (133)              | 1.100                       |                                                         | 1.115                       |                                                         | 0.1    |                                         |                                         |
| (016)              | 1.099                       | 0.6                                                     | 1.112                       | -0.5                                                    | 2.8    | 1.106±0.002                             | 1.10±0.02                               |
| (106)              | 1.096                       |                                                         | 1.109                       |                                                         | 0.7    |                                         |                                         |
| (230)              | 1.091                       |                                                         | 1.106                       |                                                         | 0.7    |                                         |                                         |
| (125)              | 1.084                       |                                                         | 1.098                       |                                                         | 3.9    |                                         |                                         |
| (231)              | 1.077                       |                                                         | 1.092                       |                                                         | 3.7E-5 |                                         |                                         |
| (224)              | 1.075                       |                                                         | 1.089                       |                                                         | 6.8    |                                         |                                         |
| (320)              | 1.073                       |                                                         | 1.088                       |                                                         | 0.8    |                                         |                                         |
| (215)              | 1.074                       |                                                         | 1.087                       |                                                         | 1.3E-3 |                                         |                                         |
| (313)              | 1.072                       |                                                         | 1.086                       |                                                         | 4.5    |                                         |                                         |
| (321)              | 1.060                       |                                                         | 1.074                       |                                                         | 3.7    |                                         | 1.07±0.01 (??)                          |
| (116)              | 1.056                       |                                                         | 1.069                       |                                                         | 0.7    |                                         |                                         |
| (034)              | 1.050                       |                                                         | 1.064                       |                                                         | 6.0    |                                         |                                         |
| (232)              | 1.039                       | 0.8                                                     | 1.054                       | -0.7                                                    | 11.6   | 1.047±0.002                             | 1.04±0.01                               |
| (322)              | 1.024                       |                                                         | 1.038                       |                                                         | 1.2    |                                         |                                         |
| (304)              | 1.023                       |                                                         | 1.036                       |                                                         | 0.3    |                                         |                                         |
| (134)              | 1.013                       |                                                         | 1.026                       |                                                         | 1.3    |                                         |                                         |
| (040)              | 0.996                       |                                                         | 1.010                       |                                                         | 3.8E-2 |                                         |                                         |
| (026)              | 0.992                       |                                                         | 1.004                       |                                                         | 2.7    |                                         |                                         |
| (314)              | 0.991                       |                                                         | 1.003                       |                                                         | 1.2    |                                         |                                         |
| (041)              | 0.986                       |                                                         | 1.000                       |                                                         | 0      |                                         |                                         |
| (233)              | 0.984                       |                                                         | 0.998                       |                                                         | 2.9E-5 |                                         |                                         |
| (206)              | 0.981                       |                                                         | 0.993                       |                                                         | 5.1    |                                         |                                         |
| (007)              | 0.980                       |                                                         | 0.992                       |                                                         | 0      |                                         |                                         |
| (225)              | 0.973                       |                                                         | 0.985                       |                                                         | 8.6E-4 |                                         |                                         |
| (323)              | 0.972                       |                                                         | 0.984                       |                                                         | 2.9    |                                         |                                         |
| (140)              | 0.964                       |                                                         | 0.978                       |                                                         | 0.5    |                                         |                                         |
| (126)              | 0.960                       |                                                         | 0.972                       |                                                         | 1.1    |                                         |                                         |
| (042)              | 0.957                       | 0.2                                                     | 0.970                       | -1.1                                                    | 1.4    | 0.959±0.002                             |                                         |
